# The Ectodomain of TLR3 Receptor Is Required for Its Plasma Membrane Translocation

Jelka Pohar<sup>1</sup>, Nina Pirher<sup>1</sup>, Mojca Benčina<sup>1,2</sup>, Mateja Manček-Keber<sup>1,2</sup>, Roman Jerala<sup>1,2,3\*</sup>

**1** National Institute of Chemistry, Hajdrihova 19, Ljubljana, Slovenia, **2** EN-FIST Centre of Excellence, Ljubljana, Slovenia, **3** Faculty of Chemistry and Chemical Technology, University of Ljubljana, Ljubljana, Slovenia

## Abstract

Toll-like receptor 3 (TLR3) is a dsRNA sensing receptor that is localized in the cellular compartments but also at the plasma membrane. Overexpression of UNC93B1 promoted localization of TLR3, but not other nucleic acid sensing TLRs, to the plasma membrane. Here we show that UNC93B1 itself is localized at the plasma membrane. We investigated the role of different domains of TLR3 on cell signaling by preparing chimeric receptors between TLR3 and TLR9 where each of the transmembrane segments or cytosolic domains has been exchanged. While the ectodomain completely governs ligand specificity and the cytosolic TIR domain determines the engagement of the signaling adapters as well as the potentiation of receptor activation by UNC93B1, the ectodomain but not transmembrane segment or cytosolic domain determines plasma membrane localization of TLR3. Nevertheless, TLR3 receptor and ligand endocytosis as well as endosomal acidification are important for the robust signaling of TLR3.

**Citation:** Pohar J, Pirher N, Benčina M, Manček-Keber M, Jerala R (2014) The Ectodomain of TLR3 Receptor Is Required for Its Plasma Membrane Translocation. PLoS ONE 9(3): e92391. doi:10.1371/journal.pone.0092391

**Editor:** Kui Li, University of Tennessee Health Science Center, United States of America

**Received:** June 5, 2013; **Accepted:** February 21, 2014; **Published:** March 20, 2014

**Copyright:** © 2014 Pohar et al. This is an open-access article distributed under the terms of the Creative Commons Attribution License, which permits unrestricted use, distribution, and reproduction in any medium, provided the original author and source are credited.

**Funding:** This work was supported by the project and program grant from the Slovenian Research Agency (<http://www.arrs.gov.si/en/dobrodoslica.asp>), International Centre for Genetic Engineering and Biotechnology (CRP-ICGEB research grant - project no. CRP/SLO08-01; <http://www.icgeb.org/home.html>) and EN-FIST Centre of Excellence (<http://enfist.si/En/>) financed in part by the European Union structural funds. The funders had no role in study design, data collection and analysis, decision to publish, or preparation of the manuscript.

**Competing Interests:** The authors have declared that no competing interests exist.

\* E-mail: roman.jerala@ki.si

## Introduction

Toll-like receptors (TLRs) are a family of pattern recognition receptors which promote efficient innate immune response by recognizing the conserved pathogen associated molecular patterns (PAMPs) or endogenous danger associated signals (DAMPs) [1,2]. Recognition of those signals and subsequent activation of signaling pathways lead to cytokine and chemokine production and maturation of adaptive immune response [3]. TLRs have common domain structure with a large N-terminal horseshoe-shaped ectodomain which consists of conserved leucine-rich repeats (LRRs), a transmembrane helix and a C-terminal cytoplasmic Toll-interleukin-1 receptor (TIR) domain [1]. TLRs differ in their ligand specificity, cellular localization of the receptors and signaling pathways [3]. TLR1, TLR2, TLR4, and TLR6 are expressed at the plasma membrane and recognize PAMPs in the bacterial cell wall components from Gram-positive and Gram-negative bacteria, yeast and fungi. TLR5 is also localized at the plasma membrane and recognize flagellin. TLR3 and TLR9 are members of nucleic-acid sensing TLRs along with TLR7, TLR8 and TLR13. They are mainly confined to intracellular compartments [1,4]. Upon stimulation by agonists they translocate from endoplasmic reticulum (ER) to the endosomes where they can encounter the internalized nucleic acid ligands [5,6]. Ligands of nucleic acid-sensing (NAS) TLRs are viral or bacterial nucleic acids [1,7]. TLR3 recognizes double-stranded RNA (dsRNA) which is formed during the replication process of many viruses [8,9] and TLR9 recognizes the nonmethylated CpG motives in microbial DNA [10]. Activation of TLR3 and binding affinity with

ligand are pH and length dependent. The strongest response to dsRNA is achieved between pH 5.7 and 6.7 [11] which corresponds to endosomal pH range [12].

Localization, trafficking and therefore also signaling of NAS TLRs to endosomes depends on the accessory protein – Unc93b1 (mouse *Unc93b1*) [13,14]. *Unc93b1* is a 12-helical-membrane spanning ER resident protein [15]. It interacts with transmembrane segments (TM segment) of TLR3, TLR7, TLR9, TLR11 and TLR13 [16–18]. Mice carrying the *Unc93b1* 3D mutation (H412R) are highly susceptible to infection with intracellular pathogens (e.g. mouse cytomegalovirus, *Listeria monocytogenes* and *Staphylococcus aureus*) and have impaired response via TLR3, TLR7 and TLR9 [15]. Report on the interaction between the N-terminal cytoplasmic tail of *Unc93b1* and the cytoplasmic domain of intracellular TLRs demonstrated the role of *Unc93b1* in TLR trafficking. This region on *Unc93b1*, especially the residue D34, regulates the association and interaction affinity for nucleic-acid sensing TLRs. D34A mutation markedly weakens interaction with TLR9 and promotes interaction with TLR7 [19].

Upregulation of UNC93B1 (human UNC93B1) increased the amount of TLR3, but not TLR7, TLR8 or TLR9, at the plasma membrane [20]. In our study we aimed to identify the domain harboring the plasma membrane localization signal of TLR3. This was achieved through chimeric TLR3-TLR9 receptors where the transmembrane, cytosolic or ectodomains have been exchanged. Rather than in the transmembrane or cytosolic domain as reported previously for other NAS TLRs, we found that the ectodomain of TLR3 governs the plasma membrane localization. Moreover, we showed that the TLR3 at the plasma membrane

**Table 1.** Constructs used in experiments and their amino acid composition.

| Construct               | Vector | Amino acid composition                            | Designation     |
|-------------------------|--------|---------------------------------------------------|-----------------|
| wt hTLR3                | pUNO   |                                                   | TLR3            |
| wt hTLR3-mCer           | pcDNA3 |                                                   | TLR3-mCer       |
| wt hTLR9-HA             | pUNO   |                                                   | TLR9            |
| wt hTLR9-YFP            | pcDNA3 |                                                   | TLR9-YFP        |
| TLR3 with tmTLR9        | pUNO   | TLR3 (M1-L704) TLR9 (C818-L838) TLR3 (E726-H904)  | TLR3-9-3        |
| TLR3 with tmTLR9 - mCer | pcDNA3 |                                                   | TLR3-9-3 - mCer |
| TLR9 with tmTLR3 - HA   | pUNO   | TLR9 (M1-D817) TLR3 (F705-F725) TLR9 (C839-E1032) | TLR9-3-9        |
| TLR9 with tmTLR3 - YFP  | pcDNA3 |                                                   | TLR9-3-9 - YFP  |
| TLR3 with cytoTLR9-HA   | pUNO   | TLR3 (M1- F725) TLR9 (C839-E1032)                 | TLR3-3-9        |
| TLR3 with cytoTLR9-YFP  | pcDNA3 |                                                   | TLR3-3-9 - YFP  |
| TLR9 with cytoTLR3-HA   | pUNO   | TLR9 (M1- L838) TLR3 (E726-H904)                  | TLR9-9-3        |
| TLR9 with cytoTLR3-YFP  | pcDNA3 |                                                   | TLR9-9-3 - YFP  |

HA-hemagglutinin tag.  
mCer – mCerulean fluorescent protein.  
YFP – yellow fluorescent protein.  
tm – transmembrane segment.  
cyto – cytosolic domain.  
doi:10.1371/journal.pone.0092391.t001

colocalizes with poly(I:C). However, potent TLR3 activation requires the endosomal localization since inhibitors of endosomal acidification and endocytosis greatly reduced the response of cells with the endogenous levels of UNC93B1 as well as in cells overexpressing UNC93B1.

## Materials and Methods

### Cell cultures

Human embryonic kidney cells (HEK) 293 and HEK293T were cultivated in DMEM (Invitrogen) supplemented with 10% (v/v) FBS (Gibco) at 37°C in 5% CO<sub>2</sub>.

### Plasmids and reagents

Expression plasmids containing sequences of TLR3 (pUNO-hTLR3), TLR9 (pUNO-hTLR9-HA), and UNC93B1 (pUNO1-hUNC93B1) were from InvivoGen, TLR3-mCer (pcDNA3-hTLR3-mCerulean) containing plasmid was prepared in our lab [9], TLR9-YFP (pcDNA3-hTLR9-YFP) was from Addgene, plasmid constitutively expressing *Renilla* luciferase-phRL-TK was from Promega, pmCherry-C1 was from Clontech Laboratories. The following plasmids were gifts: plasmid coding for firefly luciferase under NF-κB promoter (pELAM-1-luciferase) was gift from C. Kirschning (Institute for Medical Microbiology, University of Duisburg-Essen, Essen, Germany), plasmid coding for firefly luciferase under IFN-β promoter (pIFN-β-luciferase; from J. Hiscott, Departments of Microbiology and Medicine, McGill University, Montreal, QC, Canada), Unc93b1-GFP and EEA1-Tomato were gift from T. Espevik (Norwegian University of Science and Technology, Trondheim, Norway) and pmCerulean-C1 was provided by D. Piston (Vanderbilt University, Nashville, TN, USA).

Cells were treated with different TLR ligands: polyinosinic-polycytidylic acid - poly(I:C) (InvivoGen) and type B CpG-oligodeoxynucleotide ODN10104 (Coley Pharmaceutical Group). Cells were treated with different inhibitors: inhibitor of actin polymerization - cytochalasin D (Sigma Aldrich), inhibitor of

dynamin – Dynasore (Sigma Aldrich) and inhibitor of endosomal acidification - bafilomycin A (LC Laboratories).

### DNA constructs preparation

All chimeric DNA constructs were created by means of a PCR overlap extension technique and cloned into pUNO vector (InvivoGen). Proofreading DNA polymerase AccuPrime Pfx (Invitrogen) was used in all reactions. TLR3-9-3 stands for a construct where TM segment of TLR3 has been exchanged with TM segment of TLR9. TLR9-3-9 stands for a construct where TM segment of TLR9 has been exchanged with TM segment of TLR3. TLR3-3-9 stands for a construct where cytoplasmic domain of TLR3 has been exchanged with cytoplasmic domain of TLR9. TLR9-9-3 stands for a construct where cytoplasmic domain of TLR9 has been exchanged with cytoplasmic domain of TLR3. All constructs were sequenced. Primer sequences are available upon request. Fusions with fluorescent protein to the C-terminus of the chimeric DNA constructs were also prepared. Constructs were cloned into pcDNA3 vector. TLR3-9-3 was cloned between *Clal* and *Bam*HI restriction sites into native pcDNA3-hTLR3-mCerulean. TLR9-3-9, TLR3-9-9 and TLR9-9-3 were cloned between *Bsp*EI and *Bam*HI restriction sites into pcDNA3-hTLR9-YFP. Resulting constructs were TLR3-9-3-mCerulean, TLR9-3-9-YFP, TLR3-3-9-YFP and TLR9-9-3-YFP. A list of all constructs with their amino acid composition is summarized Table 1.

pUNO-UNC93B1-mCherry-Myc and pUNO-Unc93b1-mCherry-Myc were created by means of a PCR overlap extension technique and cloned into pUNO vector (InvivoGen). UNC93B1, Unc93b1 and mCherry were cloned from pUNO1-hUNC93B1, Unc93b1-GFP and pmCherry-C1 plasmids respectively. Myc tag was embedded within primers used in PCR reaction.

### Transfection and reporter gene assay

HEK293 cells were plated onto CoStar White 96-well plates (Corning) at  $2.2 \times 10^4$  cells/well. After 24 h, the cells were transfected with a following plasmids: pIFN-β-luciferase (40 ng DNA/well) or ELAM1-luciferase reporter plasmid (40 ng DNA/

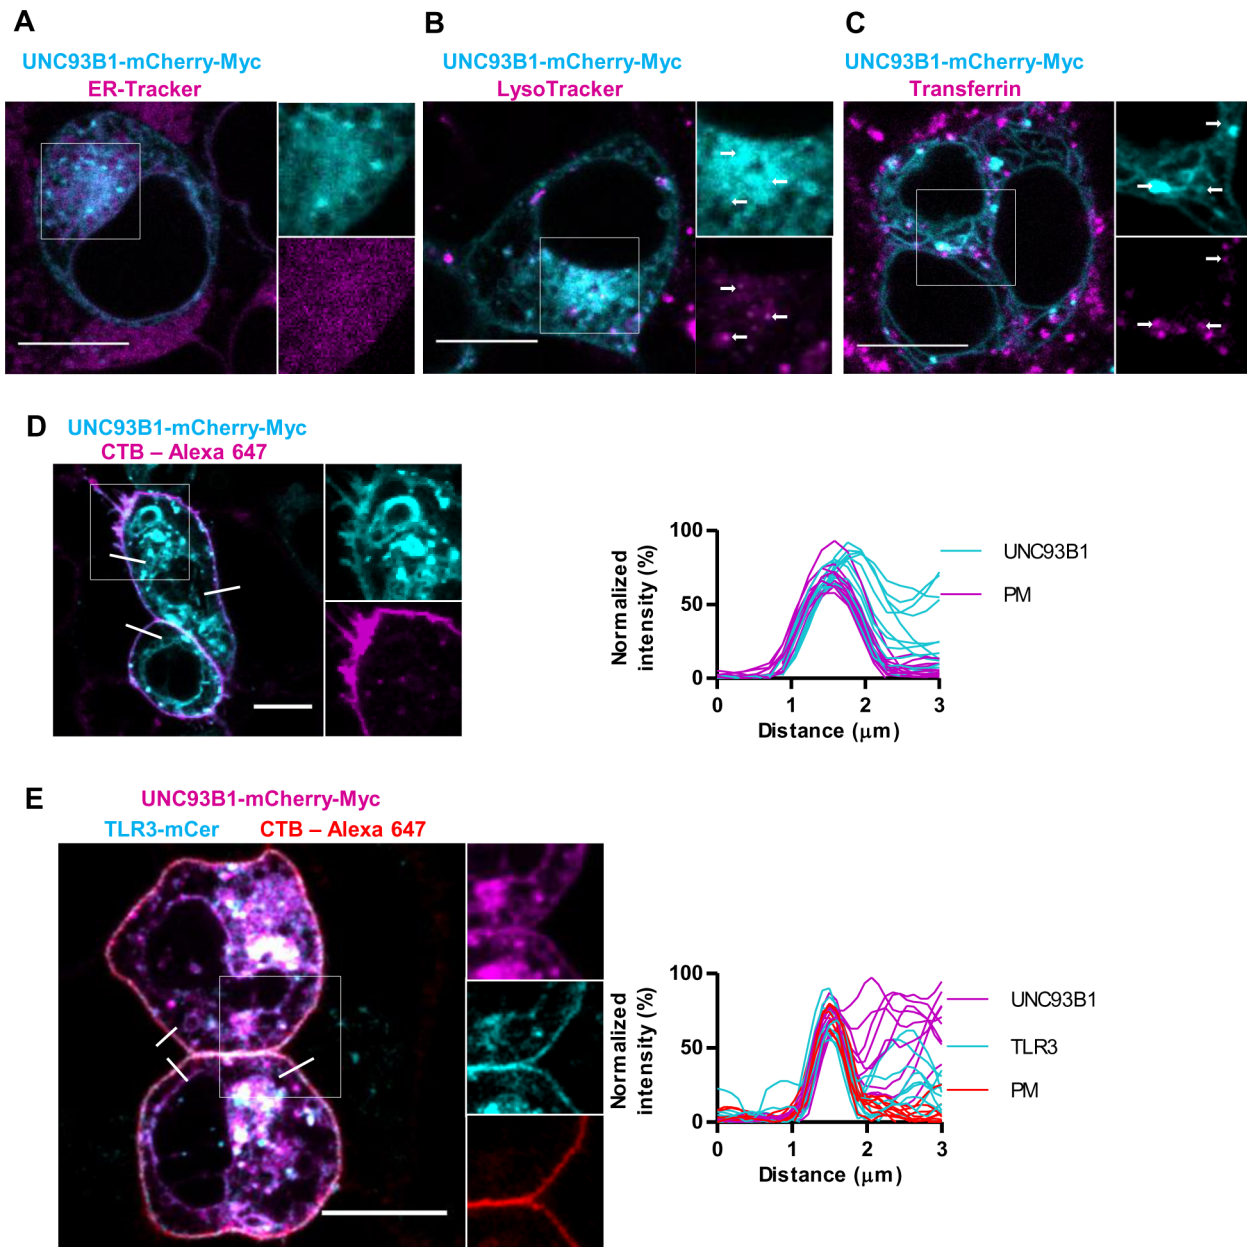

**Figure 1. UNC93B1 is localized in the ER and in the lysosomes.** (A–D) HEK293T cells were transfected with a UNC93B1-mCherry-Myc (cyan). (A) ER was dyed with ER-Tracker Blue-White DPX. (B) Lysosomes were marked with LysoTracker Green DND-26. (C) Endosomes were stained with Transferrin AlexaFluor 633 conjugate. (D) Plasma membrane was dyed with CTB-Alexa 647. All dyes are shown in magenta. White arrows indicate colocalization. (E) HEK293T cells were transfected with a UNC93B1-mCherry-Myc (magenta) and TLR3-mCerulean (cyan). Plasma membrane was dyed with CTB-Alexa 647 (red). Membrane localization was evaluated from plots of normalized fluorescence intensities of UNC93B1-mCherry-Myc and TLR3-mCerulean and plasma membrane (PM) within 3  $\mu\text{m}$  line profiles ( $n=9$ ). Three representative lines are marked on merged images. Images are selected from three independent experiments. Scale bars, 10  $\mu\text{m}$ . doi:10.1371/journal.pone.0092391.g001

well), pUNO-hTLR3-HA (20 ng DNA/well), pUNO-hTLR9-HA (20 ng DNA/well) or TLR3-TLR9 chimeric constructs (20 ng DNA/well), pUNO1-hUNC93B1 (1 ng DNA/well) and phRLTK (5 ng DNA/well). Empty vector pcDNA3 (20 ng DNA/well) was used as a negative control. Plasmids were transfected using Lipofectamine 2000 reagent according to manufacturer's instructions (Invitrogen). 24 h post transfection, the cells were stimulated with TLR ligands: poly(I:C) (10  $\mu\text{g}/\text{ml}$ ) and ODN10104 (10  $\mu\text{g}/\text{ml}$ ). 18 h after treatment, the cells were lysed in Passive Lysis Buffer (Promega). The expression of the firefly and *Renilla*

luciferase reporter gene was analyzed using the dual luciferase assay. Luminescence was quantified using the plate reader OrionII (Berthold Technologies). The relative luciferase expression (relative luciferase unit - RLU) for each sample was calculated by normalizing firefly luciferase activity for constitutive *Renilla* luciferase activity measured within the same sample.

#### SDS-PAGE and western analysis

HEK293T cells were seeded onto 12-well plates (Techno Plastic Products) at  $2.2 \times 10^5$  cells/well. After 24 h, at 50% confluence,

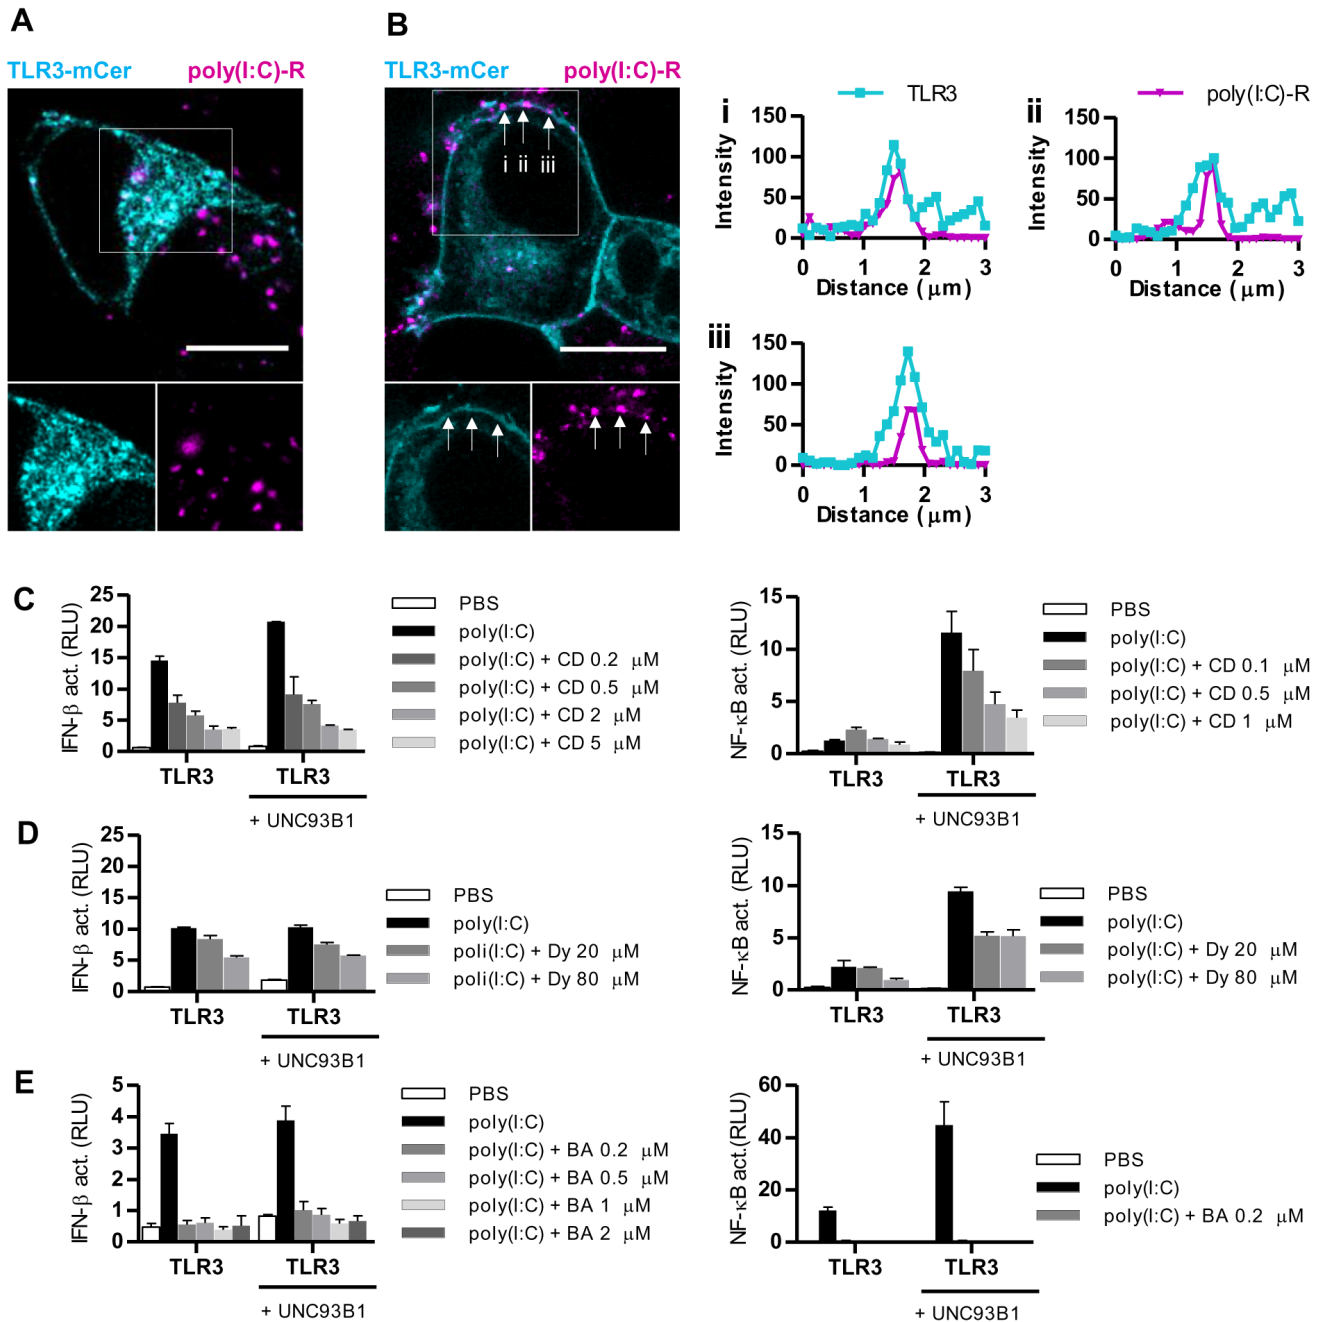

**Figure 2. Poly(I:C) and TLR3 colocalize at the surface of plasma membrane.** HEK293T cells were transfected with TLR3-mCer alone (A) or cotransfected with UNC93B1 (B). Cells were stimulated with rhodamine labeled poly(I:C) (poly(I:C)-R). (B) TLR3 and poly(I:C)-R colocalization was evaluated from plots (right) of fluorescence intensities within 3  $\mu\text{m}$  line profiles ( $n=3$ ; i, ii, iii). Three representative speckles where cross-sections were analyzed are marked with the white arrows on the merged image. (C–E) HEK293 cells were transfected with TLR3 alone or with UNC93B1 encoding plasmid. Cells were cotransfected with IFN- $\beta$  (left) or NF- $\kappa\text{B}$  (right) promoter reporter plasmid and *Renilla* reporter plasmid. Cells were simultaneously treated with poly(I:C) (10  $\mu\text{g}/\text{ml}$ ) and inhibitors. Cells were treated with increasing amounts (0.2–5  $\mu\text{M}$ ) of cytochalasin D (abbr. CD) (C), Dynasore (abbr. Dy) (20–80  $\mu\text{M}$ ) (D) or bafilomycin A (abbr. BA) (0.2–2  $\mu\text{M}$ ) (E). 8 h after treatment luciferase activity (RLU) was measured in the cell lysates. The results are represented by mean values with SD from triplicate wells. The representative data from three experiments are shown. doi:10.1371/journal.pone.0092391.g002

they were transfected with TLR3, TLR9, TLR3-TLR9 chimeric constructs and control vector pcDNA3 (900 ng DNA/well). 48 h after transfection, the cells were lysed using RIPA buffer (50 mM Tris pH 7.5, 150 mM NaCl, 1% (v/v) Triton X-100, 0.1% SDS, 0.5% DOC) with Complete Mini protease inhibitors (Roche), sonicated and centrifuged. The protein-containing supernatants

were harvested and the total protein amount was quantified using the BCA protein assay (Sigma-Aldrich). The cell extracts (30  $\mu\text{g}$  of total proteins) were incubated at 65°C for 5 min in sample buffer (SDS with 2-mercaptoethanol) and loaded onto a 12% SDS-PAGE gel. After electrophoresis, proteins were transferred onto nitrocellulose membranes Hybond-ECL (GE Healthcare) and

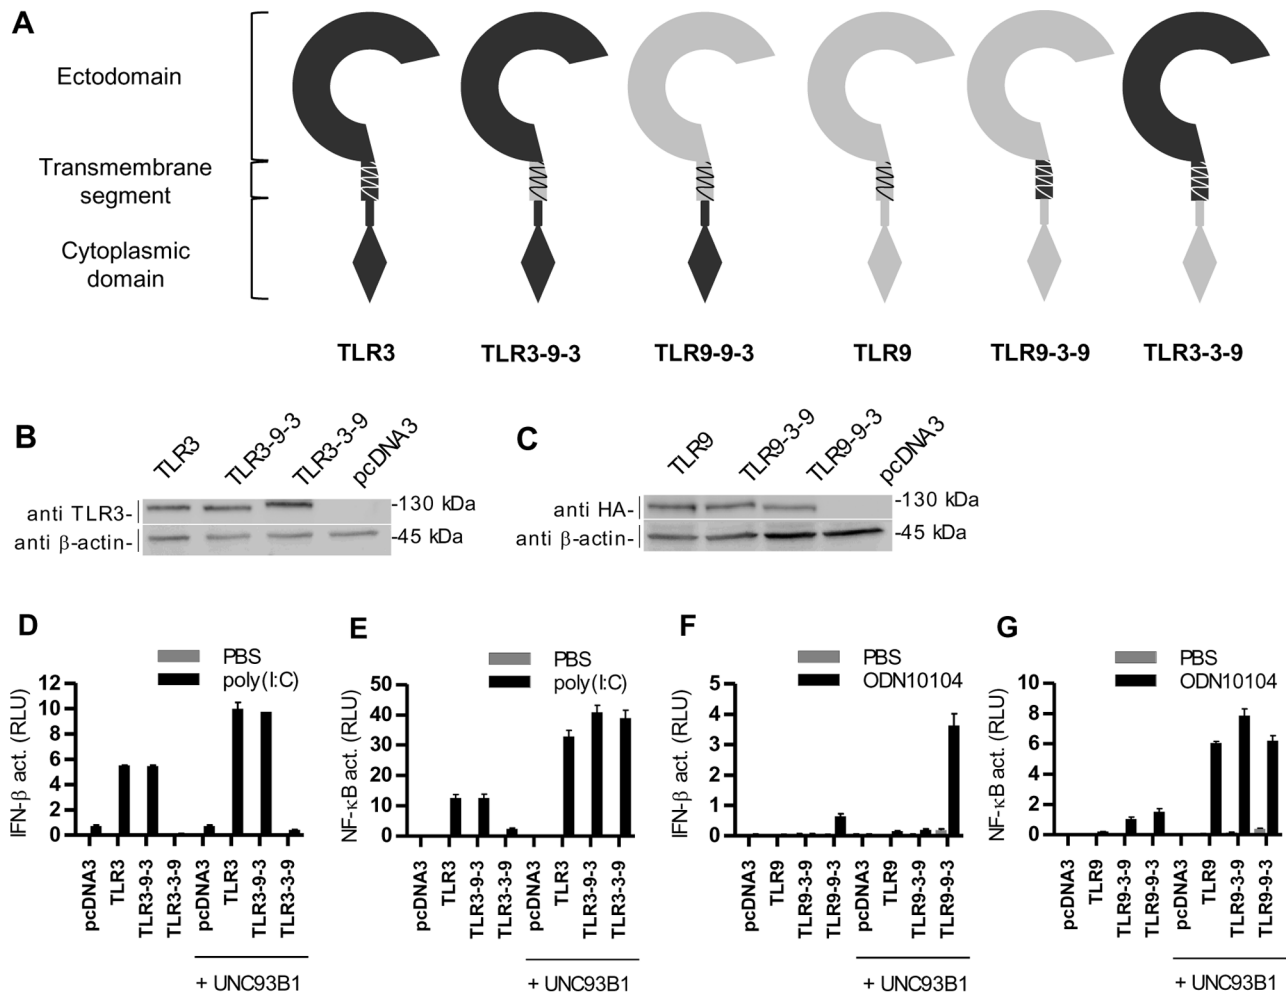

**Figure 3. Response of chimeric constructs between TLR3 and TLR9.** (A) Schematic representation of chimeric constructs where the transmembrane segments or cytoplasmic domains of human TLR3 and TLR9 receptors have been exchanged. (B, C) HEK293T cells were transfected with TLR3, TLR3-9-3 and TLR3-3-9 (B) or TLR9, TLR9-3-9 and TLR9-9-3 (C). Western blot was performed using anti-TLR3 or anti-HA antibodies. Anti- $\beta$ -actin antibodies were used as a loading control. The representative data from three experiments are shown. (D-E) HEK293 cells were transiently transfected with TLR3, TLR9 or chimeric constructs TLR3-9-3, TLR3-3-9, TLR9-3-9, and TLR9-9-3 alone or with UNC93B1. Cells were transfected with IFN- $\beta$  (D, F) or NF- $\kappa$ B (E, G) promoter reporter plasmids and *Renilla* reporter plasmid. After 18 h of stimulation with poly(I:C) (10  $\mu$ g/ml) (D, E) or ODN10104 (10  $\mu$ g/ml) (F, G), luciferase activity (RLU) was measured in the cell lysates. The results are represented by mean values with SD from triplicate wells. The representative data from three experiments are shown. doi:10.1371/journal.pone.0092391.g003

detected with following primary antibodies: mouse monoclonal anti-TLR3 (IMG-315A, Imgenex), rabbit anti-HA (H6908, Sigma-Aldrich), mouse anti- $\beta$ -actin (3700, Cell Signaling). Used secondary antibodies were: goat anti-mouse IgG-HRP (sc-2005, Santa Cruz) and goat anti-rabbit IgG-HRP (ab6721, Abcam). The blots were developed using SuperSignal West Pico Chemiluminescent Substrate (Pierce). Membranes were recorded with G:BOX Chemi using GeneSnap software (Syngene).

### Confocal microscopy

HEK293T cells were seeded onto eight-well tissue culture chambers (Ibidi) at  $2.2 \times 10^5$  cells/well. After 24 h, the cells were transfected with 150 ng DNA/well of the TLR3-mCerulean, TLR9-YFP or TLR3-TLR9 chimeric constructs fused with mCerulean or YFP, UNC93B1 (30 ng DNA/well), UNC93B1-mCherry-Myc (30 ng DNA/well) or Unc93b1-mCherry-Myc (30 ng DNA/well). For detection of early endosomes the cells were cotransfected with EEA1-Tomato (30 ng DNA/well). Localization was visualized

48 h post transfection. A plasma membrane was stained with either SynaptoRed (Biotium), Cholera Toxin Subunit B Alexa Fluor 555 or Cholera Toxin Subunit B Alexa Fluor 647 (Molecular Probes, Invitrogen). Lysosomes were stained with LysoTracker Red DND-99 or LysoTracker Green DND-26, endosomes were stained with Transferrin AlexaFluor 633 conjugate and ER was stained with ER-Tracker Red or ER-Tracker Blue-White DPX (all from Molecular Probes, Invitrogen). Poly(I:C) (LMW) labeled with rhodamine was from InvivoGen. Cell expressing endogenous levels of UNC93B were stimulated for 4 h with 10  $\mu$ g/ml of labeled poly(I:C). Cell overexpressing UNC93B were stimulated for 1 h with 10  $\mu$ g/ml of labeled poly(I:C). Images were acquired using the Leica TCS SP5 inverted laser-scanning microscope on a Leica DMI 6000 CS module equipped with a HCX Plane-Apochromat lambda blue 63 $\times$  oil-immersion objective with NA 1.4 (Leica Microsystems). Colocalization was identified with LAS AF software. Fluorescence intensity from two channels - TLR and plasma membrane were



**Table 2.** Responsiveness and fold induction after UNC93B1 overexpression of constructs containing TLR3 and TLR9 domains.

|                             | TLR3 | TLR3-9-3 | TLR9-9-3 | TLR9 | TLR9-3-9 | TLR3-3-9 |
|-----------------------------|------|----------|----------|------|----------|----------|
| IFN- $\beta$ response       | +    | +        | +        | -    | -        | -        |
| Fold induction with UNC93B1 | 2    | 2        | 6        | /    | /        | /        |
| NF- $\kappa$ B response     | +    | +        | +        | +    | +        | +        |
| Fold induction with UNC93B1 | 3    | 3        | 4        | 28   | 8        | 16       |

doi:10.1371/journal.pone.0092391.t002

measured in line profile ( $n=9$ ) in distance of 3  $\mu$ m crossing membrane. Florescence intensities per distance were plotted (GraphPad Prism software) and maximum fluorescence intensities of TLR were compared with those of plasma membrane.

### Statistical Analysis

Error bars represent mean S.D. of triplicate samples. Data were compared for significance using the one-tailed unpaired Student *t*-test and were considered significant with *p* value of 0.05.

## Results

### TLR3 and UNC93B1 colocalize at the plasma membrane

TLR3 has been found at the cell surface in several cell types such as human lung fibroblast cell line MRC-5 [21] and some epithelial and endothelial cells (human corneal epithelial cells, human lung microvascular endothelial cell, human umbilical vein endothelial cells) [23–25]. As we described before, in contrast to TLR9, UNC93B1 directs TLR3 to the plasma membrane in addition to endosomes [20]. We wanted to establish the location of UNC93B1 with respect to TLR3 and TLR9.

Accordingly to Kim *et al.* and Fukui *et al.* Unc93b1 is mainly expressed in the ER and endosomes [13,19]. Since TLR3 localizes to the cell surface upon UNC93B1 overexpression we tested whether UNC93B1 can reach the plasma membrane. HEK293T cells were transfected with UNC93B1-mCherry-Myc and dyed with specific markers for endoplasmic reticulum (ER), lysosomes, endosomes and plasma membrane. We found that UNC93B1 is mainly localized in the ER (Fig. 1A) and lysosomes (Fig. 1B) but less common in the transferrin containing early endosomes (Fig. 1C). UNC93B1-mCherry-Myc was observed at the plasma membrane in cells not expressing TLR3 as well as in cell overexpressing TLR3 (Fig. 1D and Fig 1E). Overexpression of both mouse and human UNC93B1 increased the protein levels of TLR3 (Fig. S1 C and D). However, mouse Unc93b1 does not reach the plasma membrane and it does not promote translocation of human TLR3 towards the plasma membrane (Fig. S1 A and B). In contrast to human UNC93B1 (Fig. S1C), mouse Unc93b1 does not translocate the differentially glycosylated TLR3 to the plasma membrane (Fig. S1D). The UNC93B1-mCherry-Myc and Unc93b1-mCherry-Myc both augmented signaling (Fig. S1E) and increased protein expression of TLR3 (Fig. S1D). This has been previously shown to be a consequence of the increased lifetime of TLR proteins associated with UNC93B1 [20].

### Poly(I:C) colocalizes with TLR3 at the cell surface

In order to investigate whether TLR3 and dsRNA colocalize at the cell surface, we stimulated cells with rhodamine-labeled poly(I:C). In cells that produced the endogenous amount of UNC93B1, poly(I:C) is mainly localized in the intracellular compartments (Fig. 2A). Similar intracellular localization of poly(I:C) was observed in cells with TLR3 at the cell surface. In

addition, we observed colocalization of poly(I:C) with TLR3 at the plasma membrane (Fig. 2B left). We analyzed three regions (i, ii, iii in Fig. 2B) where this colocalization was observed. Fluorescence intensities of two channels – TLR3 and poly(I:C) overlap (Fig. 2B right).

However, it is not clear whether the signaling is initiated at the plasma membrane or TLR3 and dsRNA have to be internalized to trigger signaling. We demonstrated previously that UNC93B1 enhanced activation of TLR3 [20]. Inhibitors of endocytosis (cytochalasin D and Dynasore) [26,27] (Fig. 2C and 2D) as well as endosomal acidification inhibitor (bafilomycin A) [27] (Fig. 2E), prevented activation of IFN- $\beta$  (left) and NF- $\kappa$ B (right) pathway. We observed inhibition of TLR3 signaling in cells with the endogenous level of UNC93B1 as well as in cells overexpressing UNC93B1. Our data suggest that both acidic pH and endocytosis are important for the robust TLR3 response despite its surface localization where those inhibitors should not have any effect on signaling.

### Modularity of ligand recognition and signaling pathway selection of TLR3:TLR9 chimeras

Molecular motifs determining endosomal translocation of NAS TLRs have been mapped to either the TM segment or to the cytoplasmic domain [28,29]. A cytosolic juxtamembrane domain has been reported as essential for the endosomal localization of mouse and human TLR3 [30,31]. A TM segment is required for the mouse TLR9 endosomal localization while the cytoplasmic domain has been reported to affect human TLR9 localization [32–34]. Unc93c1 physically interacts with TM segments of TLR3, TLR7, TLR8, TLR9 and TLR13 [16]. To determine which segments of TLR3 are important for the difference in cellular localization between TLR3 and TLR9, we prepared chimeric constructs, where we combined the ectodomains, TM segments and cytosolic domains of TLR3 and TLR9 in different combinations (Fig. 3A and Table 1; detailed description of chimeric receptors is provided in the section Materials and methods).

Expression levels of chimeric proteins were comparable (Fig. 3B and 3C). Agonistic ligand specificity was completely determined by respective TLR ectodomain. Chimeric proteins comprising ectodomain of TLR3 conferred response to poly(I:C) (Fig. 3D and 3E) and chimeric proteins comprising ectodomain of TLR9 responded to ODNs (Fig. 3F and 3G).

The signaling pathway that was activated upon stimulation was governed by the cytoplasmic domain of each chimeric receptor. The presence of the cytoplasmic domain of TLR3 induced activation of IFN- $\beta$  as well as NF- $\kappa$ B response, while the constructs comprising the cytoplasmic domain of TLR9 activated NF- $\kappa$ B (Fig. 3E and 3G) but poorly activated the IFN- $\beta$  pathway (Fig. 3D and 3F). This demonstrates that TIR domains independently determine the signaling pathway [28].

UNC93B1 augmented signaling of TLR3 and TLR9 as well as in all chimeric receptors (Fig. 3D-G). With respect to the

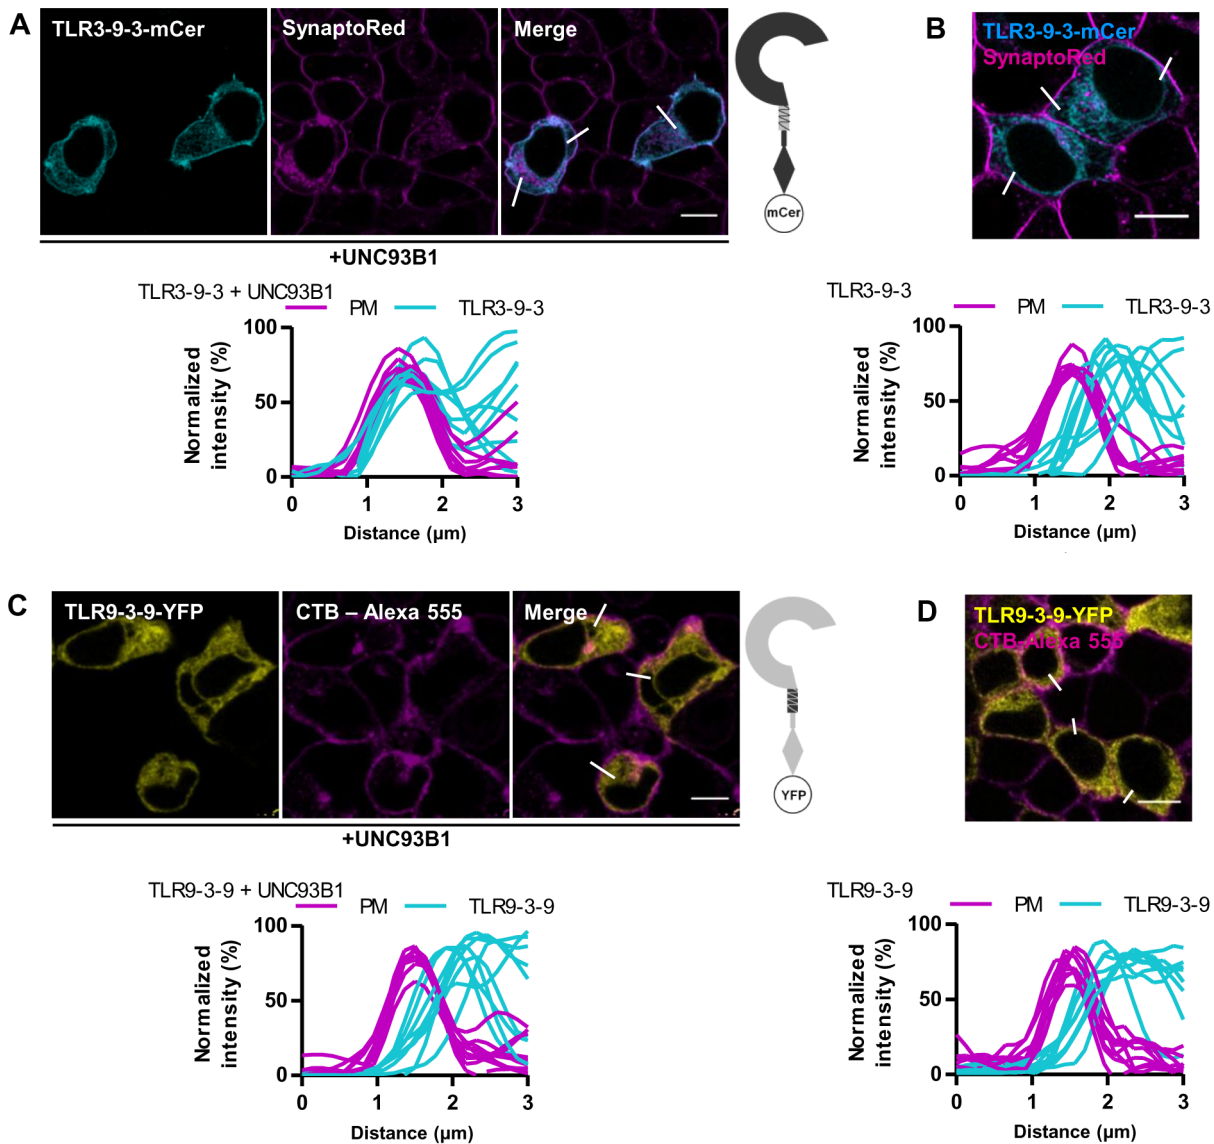

**Figure 4. Localization of chimeric receptors with exchanged TM segments of TLR3 and TLR9.** HEK293T cells were transiently transfected TLR3-9-3-mCer (A and B - cyan), TLR9-3-9-YFP (C and D - yellow), and with UNC93B1. Plasma membrane markers SynptoRed and CTB-Alexa 555 are shown in magenta. (A) Localization of TLR3-9-3-mCer on plasma membrane in cells overexpressing UNC93B1. (B) Intracellular localization of TLR3-9-3-mCer in HEK293T without overexpression of UNC93B1. (C) Intracellular localization of TLR9-3-9-YFP in cells overexpressing UNC93B1. (D) Intracellular localization of TLR9-3-9-YFP in HEK293T without overexpression of UNC93B1. (A-D) Data are representative of three experiments. TLR membrane localization was evaluated from plots (bottom) of normalized fluorescence intensities of TLR and plasma membrane (PM) within 3  $\mu\text{m}$  line profiles ( $n=9$ ). Three representative lines are marked on merged images. Images are selected from three independent experiments. Scale bars, 10  $\mu\text{m}$ . doi:10.1371/journal.pone.0092391.g004

enhancement of activation by the upregulation of UNC93B1 the effect was governed by the cytosolic TIR domain, while the TM segment had no effect suggesting that the affinity of the TM segment of TLR3 and TLR9 to the UNC93B1 is comparable. Response of constructs with the cytoplasmic domain of TLR9 was enhanced by up to 28 fold while UNC93B1 amplified the response of constructs with TLR3 cytoplasmic domain from 2 to 6 fold. Fold induction is calculated as the ratio of the response after UNC93B1 overexpression to the response without UNC93B1 overexpression (Table 2).

#### The ectodomain of TLR3 is responsible for the UNC93B1-dependent translocation to the plasma membrane

Chimeric TLRs tagged with a C-terminal fluorescent protein were used to detect the cellular localization of chimeric proteins. TLR3-9-3-mCer chimera localized at the cell surface in case of UNC93B1 overexpression (Fig. 4A) but TLR9-3-9-YFP was restricted to intracellular compartments (Fig. 4C), suggesting that neither the TM segment nor the cytosolic domain are the decisive factor directing the localization of TLR3 towards the plasma membrane. UNC93B1 delivered chimeric protein TLR3-3-9-YFP to the plasma membrane (Fig. 5A), but TLR9-9-3-YFP (Fig. 5C) exhibited only intracellular localization. In cells expressing low amount of UNC93B1 all receptors localized like the wild type

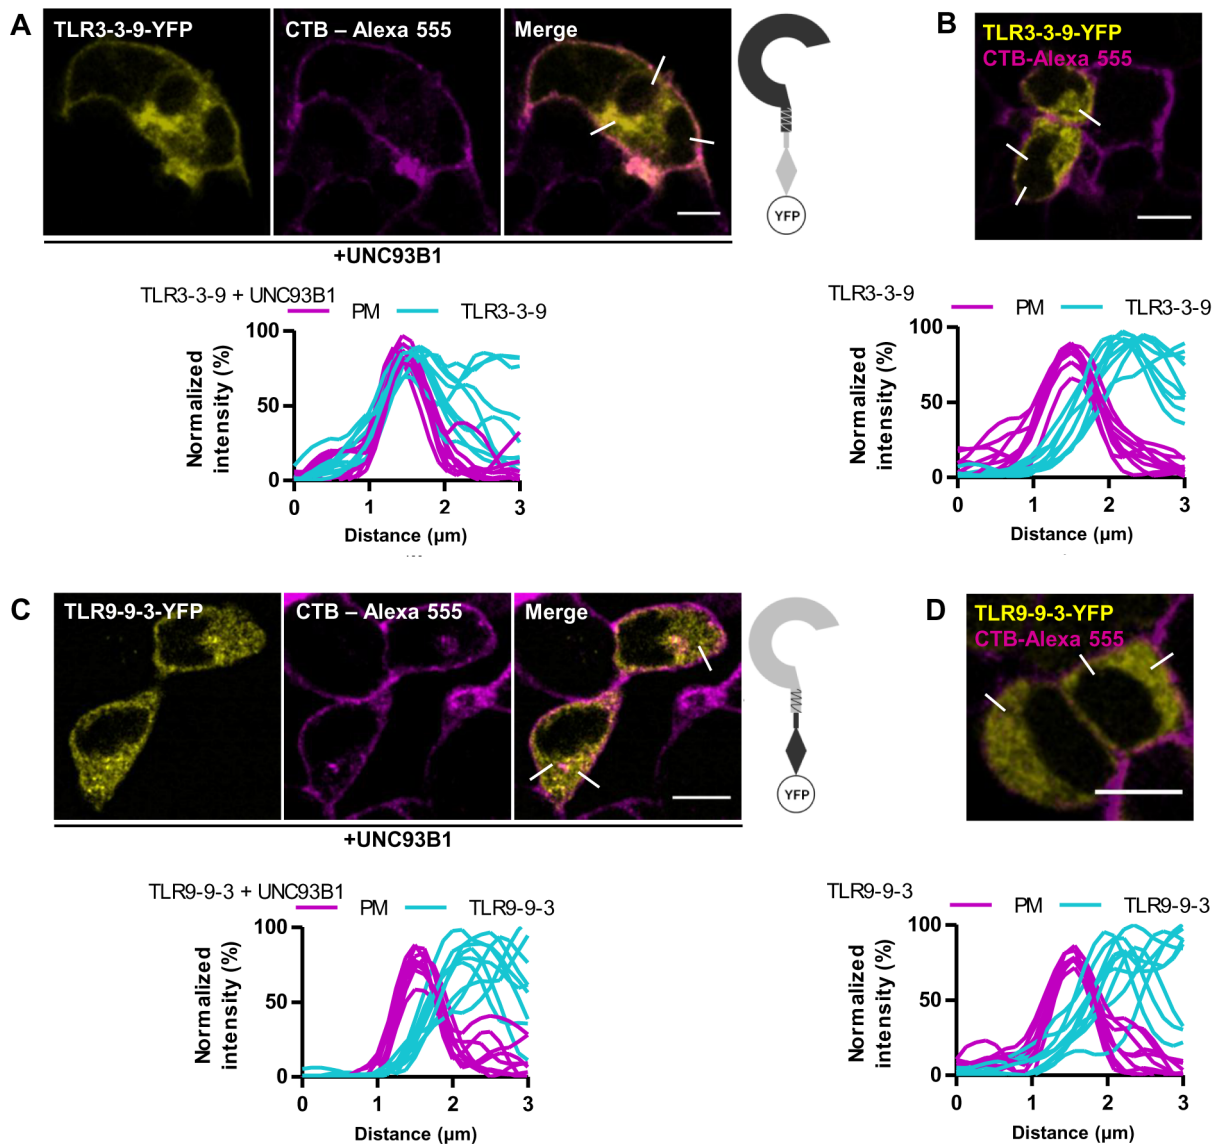

**Figure 5. Localization of chimeric receptors with exchanged cytosolic domains of TLR3 and TLR9.** HEK293T cells were transiently transfected TLR3-3-9-YFP (A and B - yellow) or TLR9-9-3-YFP (C and D - yellow) and with UNC93B1. Plasma membrane markers SynaptoRed and CTB-Alexa 555 are shown in magenta. (A) Localization of TLR3-3-9-YFP on plasma membrane in cells overexpressing UNC93B1. (B) Intracellular localization of TLR3-3-9-YFP in HEK293T without overexpression of UNC93B1. (C) Intracellular localization of TLR9-9-3-YFP in cells overexpressing UNC93B1. (D) Intracellular localization of TLR9-9-3-YFP in HEK293T without overexpression of UNC93B1. (A–D) Data are representative of three experiments. TLR membrane localization was evaluated from plots (bottom) of normalized fluorescence intensities of TLR and plasma membrane (PM) within 3  $\mu\text{m}$  line profiles ( $n=9$ ). Three representative lines are marked on merged images. Images are selected from three independent experiments. Scale bars, 10  $\mu\text{m}$ .

doi:10.1371/journal.pone.0092391.g005

TLR3 and TLR9 (Fig. 4B and 4D, Fig. 5B and 5D). Analysis of colocalization confirmed that in cells overexpressing UNC93B1 the profiles from TLR3-9-3-mCer and TLR3-3-9-YFP overlap with the profiles of the plasma membrane marker (Fig. 4A bottom, Fig. 5A bottom) similar as in the wtTLR3 [20] while traces from TLR9-3-9-YFP or TLR9-9-3-YFP and plasma membrane demonstrate no membrane location (Fig. 4C bottom, Fig. 5C bottom). These results suggest that the motif governing the UNC93B1-dependent localization of TLR3 to the plasma membrane resides in the ectodomain of TLR3.

TLR3 and TLR9 are mainly localized in the ER [5,9] and so are the chimeric receptors (Fig. 6). However, structural alterations in chimeric receptors could prevent their exit from the ER.

Despite those alternations all chimeric proteins are able to translocate to endosomes and lysosomes. All receptors are also normally responsive to their ligands (Fig. 3D–3E). If translocation to endosomes of NAS TLRs is compromised (for example 3d mutation in *Unc93b1*), there is no activation of immune response [34].

## Discussion

In addition to several cell lines that constitutively express TLR3 at the plasma membrane [22–25], cell surface localization of TLR3 is also induced by the viral infection. TLR3 was detected at the cell surface in airway epithelial cells A549 and human



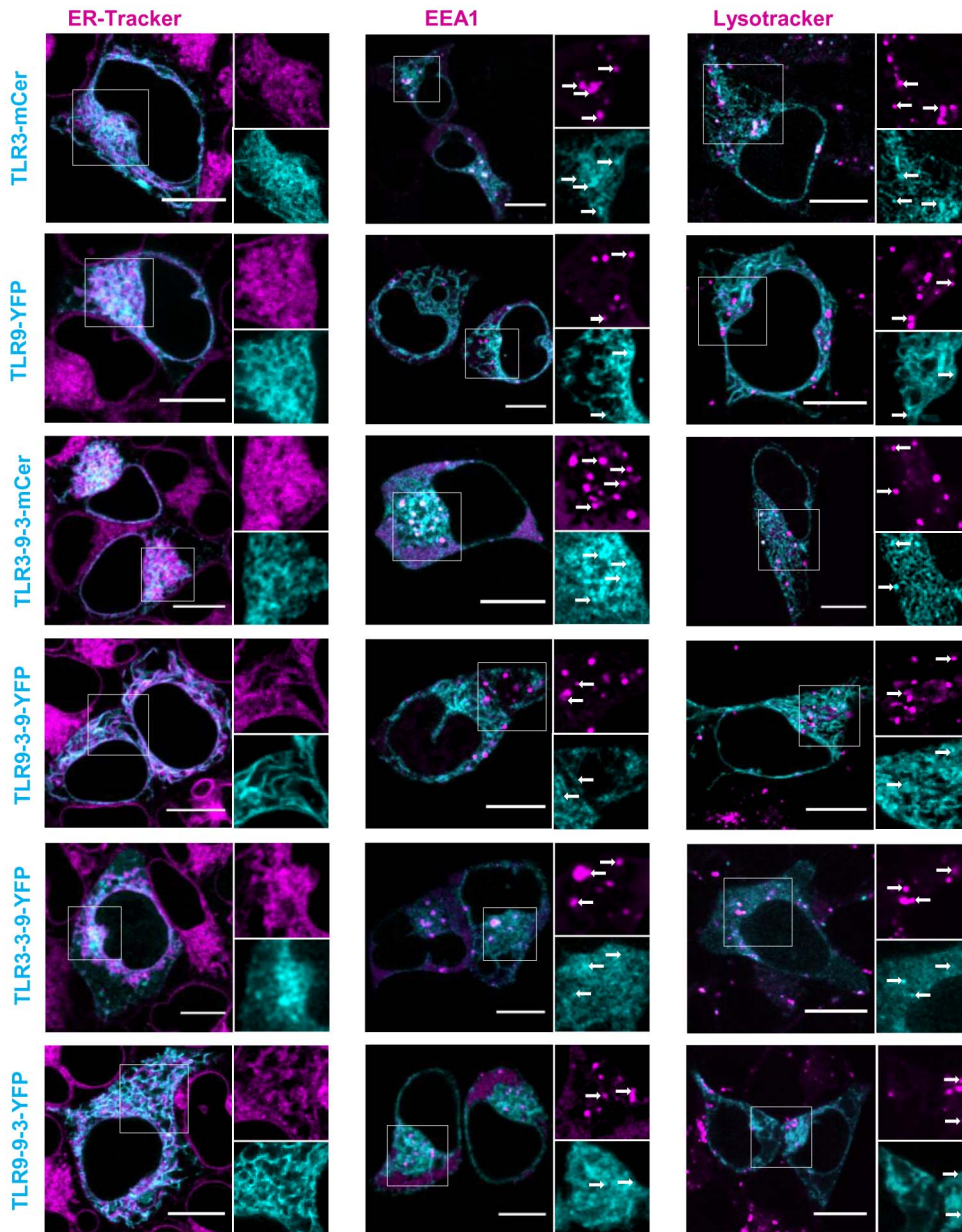

**Figure 6. Structural alterations do not affect translocation of chimeric receptors from ER to endosomes and lysosomes.** HEK293T cells were transiently transfected with TLR3-mCer, TLR9-YFP, TLR3-9-3-mCer, TLR9-3-9-YFP, TLR3-3-9-YFP or TLR9-9-3-YFP. ER was dyed with ER-Tracker Red, lysosomes were marked with LysoTracker Red DND-99. To stain endosomes, cells were cotransfected with EEA1-Tomato. All dyes are shown in magenta. White arrows indicate colocalization. Images are selected from three independent experiments. Scale bars, 10  $\mu$ m. doi:10.1371/journal.pone.0092391.g006

bronchial epithelial cells BEAS-2B upon the respiratory syncytial virus (RSV) and rhinovirus (RV) infection, respectively [35,36].

We showed that TLR3 and poly(I:C) colocalize at the surface of the plasma membrane of UNC93B1 overexpressing cells. While some reports suggest that activation occurs entirely in acidic endosomes [37], several studies reported that surface expressed TLR3 participates in the recognition of dsRNA and triggers the signaling pathway. This was corroborated by the inhibition of signaling by anti-TLR3 antibodies [22,35,36]. Bouteiller et al. demonstrated that in contrast to dsRNA, activating antibodies against TLR3 ectodomain activated TLR3-CD32 chimeric protein from the cell surface in a pH-independent manner. Binding of endogenous extracellular dsRNA to TLR3 at cell

membrane is still possible but due to higher pH probably less efficient than in endosomes [11]. Our results show that both, endocytosis and endosomal acidification, are important for the robust poly(I:C)-induced signaling through TLR3. Endosomal activation of TLR3 seems to be much stronger than activation of cell surface associated TLR3, possibly due to smaller number of receptors at the cell surface or cellular localization of TRIF adaptor (TIR-domain-containing adapter-inducing interferon- $\beta$ ) [38]. TRIF adaptor can reach the plasma membrane but only by the aid of a myristoylated TRAM adaptor (TRIF-related adaptor molecule) [39]. Unlike TLR4, TLR3 does not recruit the TRAM adaptor [40]. DsRNA is important for activation of TLR3 and cytosolic dsRNA sensors and enters into cells by clathrin

dependent endocytosis [41]. However, it is not clear if TLR3 itself can facilitate the internalization of dsRNA, similar as the TLR4 which was rapidly endocytosed following the binding of its agonist, [42] since the TLR3 binds dsRNA weakly at the physiological pH. However, binding of membrane TLR3 to polymeric poly(I:C) is likely to have high avidity. Poly(I:C) can be internalized with the aid of Raftlin which interacts with nucleic acids at the plasma membrane [43] or in a complex with the antimicrobial peptide LL-37 through FPRL-1 receptor [44].

We reported that UNC93B1 is responsible for trafficking of differentially glycosylated TLR3, but not TLR7, TLR8 or TLR9, to the plasma membrane [20]. However, in unstimulated cells UNC93B1 is localized in ER and in lysosomes, consistent with previous studies [13,20]. Localization of TLR9 to the cell membrane has been reported in HEK293 as a consequence of stimulation with CpG DNA [5] on human peripheral blood mononuclear cells (PBMC) stimulated by LPS [45] and on mouse intestinal epithelial cells after exposure of cells to DNA from pathogenic *Salmonella enterica* [46]. Recently it has been reported that Unc93b1 is also required for the surface appearance of mouse TLR9 [47], however, we could not detect the surface localization of TLR9 on HEK293 cells. The reason for those differences may be that we investigated localization of the human and not mouse TLR9. On the other hand forced cell surface localization of TLR9 induced severe autoimmune defects in mice [48].

We found that receptors with the cytosolic domain of TLR9 were far more responsive to the UNC93B1 overexpression. These data further support the idea, that the cytosolic domain defines the strength of interaction between TLR9 and UNC93B1 in agreement with the effect of cytosolic D34A mutation of Unc93b1 which suppressed the selectivity of Unc93b1 for TLR9 vs. TLR7 [19]. Our results demonstrate that the motif directing the UNC93B1 dependent sorting of TLR3 to the plasma membrane most likely resides within the ectodomain of TLR3. Unc93b1 alone could interact with segments of TLR3 ectodomain [49,50]. It is also possible that an additional accessory protein participates in sorting of TLR3 to the cell surface, versus sorting to the endosomes. We observed that mouse Unc93b1, similar as human UNC93B1, augment TLR3 signaling and increases TLR3 protein expression but it does not translocate human TLR3 towards the plasma membrane. TLR3 surface localization is also associated with appearance of differentially glycosylated TLR3 [20,51] which does not appear in cells overexpressing mouse Unc93b1. This demonstrates that there could be a difference in interaction between mouse and human UNC93B1 with TLR3. So far, plasma membrane localization of TLR3 was discovered in human cell lines [21–24,35,36].

Recent study of Kim *et al.* reported that Unc93b1 interacts with ectodomains of NAS TLRs, which was ascribed to the juxtamembrane region of TLR3 and TLR9. Those residues were important for the proper translocation of receptors from ER to endosomes [50]. Those results supports our conclusion that UNC93B1 also interacts with the ectodomain segments of NAS TLRs and not only transmembrane and cytoplasmic domains as it was shown before [16,19]. Those residues could be important for phenomena we discovered; however translocation of TLR3 has not been tested by Kim *et al.* Besides the mentioned acidic amino acid residues, there must be another motif in the ectodomain that governs different trafficking of TLR3 in comparison to other NAS TLRs. Nevertheless, these results support our conclusion and

findings from Qi *et al.* [49] that UNC93B1 can interact with ectodomain segments of TLR3. Qi *et al.* reported that knockdown of UNC93B1 reduced full-length TLR3 at the plasma membrane. They defined two loops named Loop 1 and Loop 2 located in LRR12 and LRR20, respectively. Deletions in Loop 1 inhibit TLR3 ectodomain secretion, whereas changes in Loop 2 only decreased secretion [49]. The deletion of 64 amino acids ( $\Delta 64$ ) between LRR10 and 12 is present in TLR3 isoform expressed in primary human astrocytes [52] and comprise Loop 1.  $\Delta 64$  interacted with UNC93B1 weaker than the wild type TLR3. Residues in Loop 1 are also required for proper translocation of TLR3 to the endosomes [51]. Qi *et al.* also showed that the human TLR3 P554S polymorphism located in Loop 2 reduced the amount of TLR3 at the cell surface relative to the WT receptor [49]. This polymorphism is associated with increased susceptibility to herpes simplex virus-1 encephalitis in children and impaired responsiveness to poly(I:C) [53].

Localization of TLR receptors is crucial for response to pathogens [4,54]. We discovered that unique interaction between the ectodomain of TLR3 and UNC93B1 contribute to the receptor trafficking to the cell surface in contrast to TLR9. TLR3-UNC93B1 interaction could control the traffic of TLR3 to compartments where it can be differentially glycosylated [20]. However, the functional role of cell surface TLR3 in mediating immune response to viral infections still needs to be resolved.

## Supporting Information

**Figure S1 Mouse Unc93b1 does not localize on the plasma membrane.** (A) HEK293T cells were transfected with Unc93b1-mCherry-Myc (magenta) and TLR3-mCer (cyan). Plasma membrane was dyed with CTB Alexa 647 (red). Membrane localization was evaluated from plots of normalized fluorescence intensities of Unc93b1-mCherry-Myc and TLR3-mCer and plasma membrane (PM) within 3  $\mu\text{m}$  line profiles ( $n = 9$ ). Three representative lines are marked on merged images. Images are selected from three independent experiments. Scale bars, 10  $\mu\text{m}$ . (C–D) HEK293T cells were transiently transfected with plasmid encoding TLR3 alone (900 ng DNA/well) or with UNC93B1-mCherry-Myc (C) or Unc93b1-mCherry-Myc (D) (both 10 and 30 ng DNA/well). TLR3 was detected on a Western blot using anti-TLR3 antibody. \* indicates the differentially glycosylated form of TLR3. Lower panel shows loading control (non-specific band). The representative data from two experiments are shown. (E) HEK293 cells were transiently transfected with TLR3 (20 ng DNA/well) alone or with UNC93B1-mCherry-Myc/Unc93b1-mCherry-Myc (1 ng DNA/well). Cells were transfected with NF- $\kappa\text{B}$  promoter reporter plasmids and *Renilla* reporter plasmid. After 18 h of stimulation with poly(I:C) (10  $\mu\text{g}/\text{ml}$ ) luciferase activity (RLU) was measured in the cell lysates. The results are represented by mean values with SD from triplicate wells. The representative data from three experiments are shown. Statistical significance is indicated by \*\*,  $p \leq 0.05$ . (TIF)

## Author Contributions

Conceived and designed the experiments: JP NP MB MMK RJ. Performed the experiments: JP NP. Analyzed the data: JP NP MB MMK RJ. Contributed reagents/materials/analysis tools: JP NP MB MMK RJ. Wrote the paper: JP NP MB MMK RJ.

## References

- Akira S, Takeda K (2004) Toll-like receptor signalling. *Nat Rev Immunol* 4: 499–511.
- Beutler B (2004) Innate immunity: an overview. *Mol Immunol* 40: 845–859.

3. Beutler B (2004) Inferences, questions and possibilities in Toll-like receptor signalling. *Nature* 430: 257–263.
4. McGettrick AF, O'Neill LAJ (2010) Localisation and trafficking of Toll-like receptors: an important mode of regulation. *Curr Opin Immunol* 22: 20–27.
5. Latz E, Schoenemeyer A, Visintin A, Fitzgerald KA, Monks BG, et al. (2004) TLR9 signals after translocation from the ER to CpG DNA in the lysosome. *Nat Immunol* 5: 190–198.
6. Johnsen IB, Nguyen TT, Ringdal M, Tryggstad AM, Bakke O, et al. (2006) Toll-like receptor 3 associates with c-Src tyrosine kinase on endosomes to initiate antiviral signaling. *EMBO J* 25: 3335–3346.
7. Chaturvedi A (2010) How location governs Toll like receptor signaling. *Traffic* 10: 621–628.
8. Alexopoulou L, Holt AC, Medzhitov R, Flavell RA (2001) Recognition of double-stranded RNA and activation of NF- $\kappa$ B by Toll-like receptor 3. *Nature* 413: 732–738.
9. Pirher N, Ivicak K, Pohar J, Bencina M, Jerala R (2008) A second binding site for double-stranded RNA in TLR3 and consequences for interferon activation. *Nat Struct Mol Biol* 15: 761–763.
10. Chuang TH, Lee J, Kline L, Mathison JC, Ulevitch RJ (2002) Toll-like receptor 9 mediates CpG-DNA signaling. *J Leukoc Biol* 71: 538–544.
11. De Bouteiller O, Merck E, Hasan UA, Hubac S, Benguigui B, et al. (2005) Recognition of double-stranded RNA by human toll-like receptor 3 and downstream receptor signaling requires multimerization and an acidic pH. *J Biol Chem* 280: 38133–38145.
12. Cain CC, Sipe DM, Murphy RF (1989) Regulation of endocytic pH by the Na<sup>+</sup>,K<sup>+</sup>-ATPase in living cells. *Proc Natl Acad Sci U S A* 86: 544–548.
13. Kim YM, Brinkmann MM, Paquet ME, Ploegh HL (2008) UNC93B1 delivers nucleotide-sensing toll-like receptors to endolysosomes. *Nature* 452: 234–238.
14. Akashi-Takamura S, Miyake K (2008) TLR accessory molecules. *Curr Opin Immunol* 20: 420–425.
15. Tabeta K, Hoebe K, Janssen EM, Du X, Georgel P, et al. (2006) The Unc93b1 mutation 3d disrupts exogenous antigen presentation and signaling via Toll-like receptors 3, 7 and 9. *Nat Immunol* 7: 156–164.
16. Brinkmann MM, Spooner E, Hoebe K, Beutler B, Ploegh HL, et al. (2007) The interaction between the ER membrane protein UNC93B and TLR3, 7, and 9 is crucial for TLR signaling. *J Cell Biol* 177: 265–275.
17. Pifer R, Benson A, Sturge CR, Yarovsky F (2011) UNC93B1 is essential for TLR11 activation and IL-12-dependent host resistance to *Toxoplasma gondii*. *J Biol Chem* 286: 3307–3314.
18. Andrade WA, do Carmo Souza M, Ramos-Martinez E, Nagpal K, Dutra MS, et al. (2013) Combined action of nucleic acid-sensing Toll-like receptors and TLR11/TLR12 heterodimers imparts resistance to *Toxoplasma gondii* in mice. *Cell Host Microbe* 13: 42–53.
19. Fukui R, Saitoh S, Matsumoto F, Kozuka-Hata H, Oyama M, et al. (2009) UNC93B1 biases Toll-like receptor responses to nucleic acid in dendritic cells toward DNA- but against RNA-sensing. *J Exp Med* 206: 1339–1350.
20. Pohar J, Pirher N, Bencina M, Mancek-Keber M, Jerala R (2013) The role of UNC93B1 in surface localization of TLR3 and in cell priming to nucleic acid agonists. *J Biol Chem* 288: 442–454.
21. Matsumoto M, Kikkawa S, Kohase M, Miyake K, Seya T (2002) Establishment of a monoclonal antibody against human Toll-like receptor 3 that blocks double-stranded RNA-mediated signaling. *Biochem Biophys Res Commun* 293: 1364–1369.
22. Ueta M, Hamuro J, Kiyono H, Kinoshita S (2005) Triggering of TLR3 by poly(I:C) in human corneal epithelial cells to induce inflammatory cytokines. *Biochem Biophys Res Commun* 331: 285–294.
23. Pegu A, Qin S, Fallert Junecko BA, Nisato RE, Pepper MS, et al. (2008) Human lymphatic endothelial cells express multiple functional TLRs. *J Immunol* 180: 3399–3405.
24. Lundberg AM, Drexler SK, Williams LM, Sacre SM, Feldmann M, et al. (2007) Key differences in TLR3/poly I:C signaling and cytokine induction by human primary cells: a phenomenon absent from murine cell systems. *Blood* 110: 3245–3252.
25. Casella JF, Flanagan MD, Lin S (1981) Cytochalasin D inhibits actin polymerization and induces depolymerization of actin filaments formed during platelet shape change. *Nature* 293: 302–305.
26. Macia E, Ehrlich M, Massol R, Boucrot E, Brunner C, et al. (2006) Dynasore, a cell-permeable inhibitor of dynamin. *Dev Cell* 10: 839–850.
27. Johnson LS, Dunn KW, Pytowski B, McGraw TE (1993) Endosome acidification and receptor trafficking: bafilomycin A1 slows receptor externalization by a mechanism involving the receptor's internalization motif. *Mol Biol Cell* 4: 1251–1266.
28. Nishiya T, DeFranco AL (2004) Ligand-regulated chimeric receptor approach reveals distinctive subcellular localization and signaling properties of the Toll-like receptors. *J Biol Chem* 279: 19008–19017.
29. Nishiya T, Kajita E, Miwa S, DeFranco AL (2005) TLR3 and TLR7 are targeted to the same intracellular compartments by distinct regulatory elements. *J Biol Chem* 280: 37107–37117.
30. Funami K, Matsumoto M, Oshiumi H, Akazawa T, Yamamoto A, et al. (2004) The cytoplasmic “linker region” in Toll-like receptor 3 controls receptor localization and signaling. *Int Immunol* 16: 1143–1154.
31. Kajita E, Nishiya T, Miwa S (2006) The transmembrane domain directs TLR9 to intracellular compartments that contain TLR3. *Biochem Biophys Res Commun* 343: 578–584.
32. Barton GM, Kagan JC, Medzhitov R (2006) Intracellular localization of Toll-like receptor 9 prevents recognition of self DNA but facilitates access to viral DNA. *Nat Immunol* 7: 49–56.
33. Leifer CA, Brooks JC, Hoelzer K, Lopez J, Kennedy MN, et al. (2006) Cytoplasmic targeting motifs control localization of toll-like receptor 9. *J Biol Chem* 281: 35585–35592.
34. Tabeta K, Hoebe K, Janssen EM, Du X, Georgel P, et al. (2006) The Unc93b1 mutation 3d disrupts exogenous antigen presentation and signaling via Toll-like receptors 3, 7 and 9. *Nat Immunol* 7: 156–164.
35. Groskreutz DJ, Monick MM, Powers LS, Yarovsky TO, Look DC, et al. (2006) Respiratory syncytial virus induces TLR3 protein and protein kinase R, leading to increased double-stranded RNA responsiveness in airway epithelial cells. *J Immunol* 176: 1733–1740.
36. Hewson CA, Jardine A, Edwards MR, Laza-Stanca V, Johnston SL (2005) Toll-like receptor 3 is induced by and mediates antiviral activity against rhinovirus infection of human bronchial epithelial cells. *J Virol* 79: 12273–12279.
37. Leonard JN, Ghirlando R, Askins J, Bell JK, Margulies DH, et al. (2008) The TLR3 signaling complex forms by cooperative receptor dimerization. *Proc Natl Acad Sci U S A* 105: 258–263.
38. Funami K, Sasai M, Ohba Y, Oshiumi H, Seya T, et al. (2007) Spatiotemporal mobilization of Toll/IL-1 receptor domain-containing adaptor molecule-1 in response to dsRNA. *J Immunol* 179: 6867–6872.
39. Tanimura N, Saitoh S, Matsumoto F, Akashi-Takamura S, Miyake K (2008) Roles for LPS-dependent interaction and relocation of TLR4 and TRAM in TRIF-signaling. *Biochem Biophys Res Commun* 368: 94–99.
40. Kawai T, Akira S (2006) TLR signaling. *Cell Death Differ* 13: 816–825.
41. Itoh K, Watanabe A, Funami K, Seya T, Matsumoto M (2008) The clathrin-mediated endocytic pathway participates in dsRNA-induced IFN- $\beta$  production. *J Immunol* 181: 5522–5529.
42. Husebye H, Halaas O, Stenmark H, Tunheim G, Sandanger O, et al. (2006) Endocytic pathways regulate Toll-like receptor 4 signaling and link innate and adaptive immunity. *EMBO J* 25: 683–692.
43. Watanabe A, Tatematsu M, Saeki K, Shibata S, Shime H, et al. (2011) Raftlin is involved in the nucleocapture complex to induce poly(I:C)-mediated TLR3 activation. *J Biol Chem* 286: 10702–10711.
44. Singh D, Qi R, Jordan JL, San Mateo L, Kao CC (2013) The human antimicrobial peptide LL-37, but not the mouse ortholog, mCRAMP, can stimulate signaling by poly(I:C) through a FPRL1-dependent pathway. *J Biol Chem* 288: 8258–8268.
45. Eaton-Bassiri A, Dillon SB, Cunningham M, Ryczyn MA, Mills J, et al. (2004) Toll-like receptor 9 can be expressed at the cell surface of distinct populations of tonsils and human peripheral blood mononuclear cells. *Infect Immun* 72: 7202–7211.
46. Ewaschuk JB, Backer JL, Churchill TA, Obermeier F, Krause DO, et al. (2007) Surface expression of Toll-like receptor 9 is upregulated on intestinal epithelial cells in response to pathogenic bacterial DNA. *Infect Immun* 75: 2572–2579.
47. Lee BL, Moon JE, Shu JH, Yuan L, Newman ZK, et al. (2013) UNC93B1 mediates differential trafficking of endosomal TLRs. *Elife* 2: e00291.
48. Mouchess ML, Arpaia N, Souza G, Barbalat R, Ewald SE, et al. (2011) Transmembrane mutations in Toll-like receptor 9 bypass the requirement for ectodomain proteolysis and induce fatal inflammation. *Immunity* 35: 721–732.
49. Qi R, Hoose S, Schreiter J, Sawant K V, Lamb R, et al. (2010) Secretion of the human Toll-like receptor 3 ectodomain is affected by single nucleotide polymorphisms and regulated by Unc93b1. *J Biol Chem* 285: 36635–36644.
50. Kim J, Huh J, Hwang M, Kwon E-H, Jung D-J, et al. (2013) Acidic amino acid residues in the juxtamembrane region of the nucleotide-sensing TLRs are important for UNC93B1 binding and signaling. *J Immunol* 190: 5287–5295.
51. Qi R, Singh D, Kao CC (2012) Proteolytic processing regulates Toll-like receptor 3 stability and endosomal localization. *J Biol Chem* 287: 32617–32629.
52. Ménager P, Roux P, Mégret F, Bourgeois J-P, Le Sourd A-M, et al. (2009) Toll-like receptor 3 (TLR3) plays a major role in the formation of rabies virus Negri Bodies. *PLoS Pathog* 5: e1000315.
53. Zhang S-Y, Jouanguy E, Ugolini S, Smahi A, Elain G, et al. (2007) TLR3 deficiency in patients with herpes simplex encephalitis. *Science* (80-) 317: 1522–1527.
54. Deane JA, Bolland S (2006) Nucleic acid-sensing TLRs as modifiers of autoimmunity. *J Immunol* 177: 6573–6578.
